# Supplementary material for: Targeted Radiation Exposure Induces Accelerated Aortic Valve Remodeling in ApoE−/− Mice
Source: MDPI journal article supplement (doi:10.3390/jcm12185854), 2023-09-08
Supplement: s1 [file s1]

## STOP-AS Investigators

Hélène Eltchaninoff<sup>1</sup>, Jérémy Bellien<sup>2</sup>, Benjamin Bertrand<sup>3</sup>, Farzin Beygui<sup>4,5</sup>, Delphine Béziau-Gasnier<sup>6</sup>, Ebba Brakenhielm<sup>7</sup>, Giuseppina Caligiuri<sup>8,9</sup>, Karine Chevreul<sup>10,11</sup>, Frédérique Debroucker<sup>12</sup>, Eric Durand<sup>1</sup>, Christophe Frascini<sup>13</sup>, Martine Gilard<sup>14</sup>, Bernard Jung<sup>9</sup>, Said Kamel<sup>15</sup>, Jamila Laschet<sup>8</sup>, Alain Manrique<sup>5, 16</sup>, Emmanuel Messas<sup>17</sup>, David Messika-Zeitoun<sup>18</sup>, Florence Pinet<sup>19</sup>, Vincent Richard<sup>2</sup>, Eric Saloux<sup>4,5</sup>, Martin Thoenes<sup>20</sup>, Christophe Tribouilloy<sup>21</sup>, Claire Vézier<sup>6</sup>.

- 1- Normandie Univ, UNIROUEN, U1096, CHU Rouen, Department of Cardiology, F-76000 Rouen, France
- 2- Normandie Univ, UNIROUEN, U1096, CHU Rouen, Department of Pharmacology, F-76000 Rouen, France
- 3- Cardiawave, Paris, France
- 4- CHU de Caen, Department of Cardiology, 14000 Caen, France.
- 5- Normandie Univ, UNICAEN, UR 4650 PSIR, GIP Cyceron, Caen 14000, France.
- 6- CHU Rouen, Department of Cardiology, F-76000 Rouen, France
- 7- Normandie Univ, UNIROUEN, U1096, F-76000 Rouen, France
- 8- Laboratory for Vascular Translational Science, Université de Paris, Inserm U1148, 46 rue Henri HUCHARD, Paris 75018, France.
- 9- Department of Cardiology, Assistance Publique-Hôpitaux de Paris, Bichat Hospital 46 rue Henri Huchard, Paris 75018 and Université de Paris, France.
- 10- Université de Paris, Unité UMR 1123 ECEVE, INSERM, Paris, France.
- 11- Health Economics Clinical Research Platform (URC Eco), AP-HP, 1 Place du Parvis Notre-Dame, 75004, Paris, France.
- 12- Medtronic, Boulogne-Billancourt, France.
- 13- Supersonic Imagine, Aix-en-Provence, France
- 14- Department of Cardiology, CHRU Brest, 29200 Brest, France
- 15- UR UPJV 7517, MP3CV, CURS, Université de Picardie Jules Verne, Avenue René Laennec, 80054, Amiens, France.
- 16- CHU de Caen, Department of Nuclear Medicine, 14000 Caen, France
- 17- Université de Paris, PARCC, INSERM, F-75015 Paris, France, vascular medicine department, AP-HP.CUP, Georges Pompidou European Hospital F-75015 Paris France.
- 18- Division of Cardiology, University of Ottawa, Ottawa, Ontario, Canada.
- 19- Inserm U1167, Institut Pasteur de Lille, Université de Lille, 59000 Lille, France.
- 20- Edwards Lifesciences, Nyon, Switzerland
- 21- Department of Cardiology, Amiens University Hospital, France; EA 7517 MP3CV Université de Picardie Jules Verne, Amiens, France.
